# Supplementary material for: Early life phenobarbital exposure dysregulates the hippocampal transcriptome
Source: PubMed Central journal article supplement (PMC11007044; doi:10.3389/fphar.2024.1340691), 2024-03-28
Supplement: Image1.pdf [file Image1.pdf]

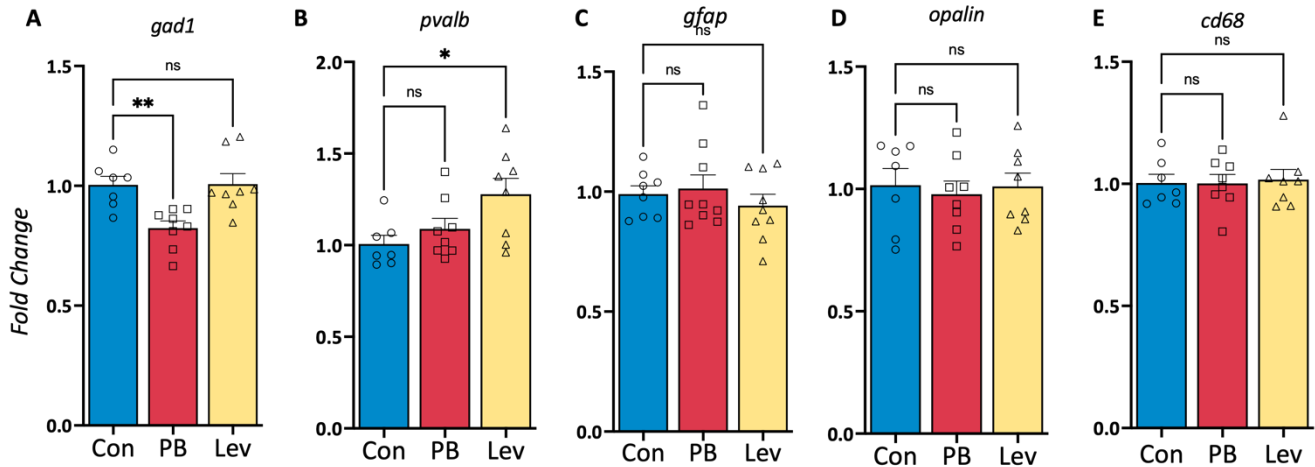

**Supplementary Figure 1. Selected transcript levels measured 3 months after drug exposure.** For the transcripts we found to be dysregulated by qPCR 3 days after drug exposure, we separately assessed their relative abundance in PB- or LEV-exposed animals 3 months after exposure. (A) *Gad1* transcript levels were lower in the PB-treated group 3 months after drug exposure ( $F_{2,20}=8.199$ ;  $P=0.0025$ ; PB v VEH: 0.055, Dunnett's test). This was consistent with the pattern we observed 3 days after drug exposure. (B) *pvalb* was *increased* in the LEV-treated group compared to vehicle or PB exposure ( $F_{2,20}=4.23$ ;  $P=0.029$ ; PB v LEV: 0.02, Dunnett's test) differing from what we observed 3 days after exposure, and the PB-treated group did not differ from controls ( $P=0.60$ ), differing from what we observed 3 days after exposure. (C-E) *Gfap*, *opalin* and *cd68* did not differ across treatment groups at 3 months post exposure. (*Gfap*:  $F_{2,23}=0.58$ ,  $p=0.57$ ; *Opalin*:  $F_{2,20}=0.12$ ,  $p=0.89$ ; *cd68*:  $F_{2,20}=0.049$ ,  $p=0.95$ ).
